# Supplementary material
Source: publisher site journal article supplement (https://www.degruyterbrill.com/publication/journal_key/JCIEA/downloadAsset/JCIEA_Template_for_Ethical_and_Legal_Declarations.docx)
Supplement: Supplementary file 2 [file JCIEA_Template_for_Ethical_and_Legal_Declarations.docx]

**Acknowledgments**

(If applicable).

**Research funding**

None declared.

**Author contributions**

All authors have accepted responsibility for the entire content of this manuscript and approved its submission.

**Competing interests**

Authors state no conflict of interest.

**Informed consent**

Informed consent was obtained from all individuals included in this study.

**Ethical approval**

The local Institutional Review Board deemed the study exempt from review.
